# Supplementary material
Source: Elsevier journal article supplement (https://www.sciencedirect.com/science/article/pii/S188558572030116X)
Supplement: mmc1 [file mmc1.pdf]

**SUPPLEMENTARY DATA**

**Tabla 1 of the supplementary data**

Baseline clinical, angiographic and procedural characteristics in patients in the RIBS IV and V trials included or not in the OCT substudy

|                                       | No OCT<br>n = 434 (87%)       | OCT<br>n = 64 (13%)           | <i>P</i>   |
|---------------------------------------|-------------------------------|-------------------------------|------------|
| <b>Age, y</b>                         | 66 ± 10                       | 65 ± 12                       | .56        |
| <b>Female sex</b>                     | 66 (15)                       | 11 (17)                       | .68        |
| <b>Risk factors</b>                   |                               |                               |            |
| <i>Diabetes mellitus</i>              | 168 (39)                      | 22 (34)                       | .51        |
| Insulin-dependent                     | 64 (15)                       | 6 (9)                         | .25        |
| <i>Hyperlipidemia</i>                 | 321 (74)                      | 41 (64)                       | .10        |
| <i>Hypertension</i>                   | 323 (74)                      | 44 (69)                       | .34        |
| <i>Eversmoker</i>                     | 259 (60)                      | 43 (67)                       | .25        |
| <b>Clinical features</b>              |                               |                               | .95        |
| <i>Unstable angina</i>                | 213 (49)                      | 26 (41)                       | .21        |
| <i>Previous myocardial infarction</i> | 222 (51)                      | 41 (64)                       | .05        |
| <i>Previous bypass surgery</i>        | 41 (9)                        | 3 (5)                         | .21        |
| <i>Time to restenosis, d</i>          | 517 [226-1703]<br>1169 ± 1362 | 237 [233-2006]<br>1143 ± 1327 | .55<br>.28 |
| <i>Ejection fraction, %</i>           | 58 ± 11                       | 62 ± 13                       | .01        |
| <b>Target artery</b>                  |                               |                               | .38        |
| <i>Left anterior descending</i>       | 192 (44)                      | 28 (44)                       |            |
| <i>Left circumflex</i>                | 88 (20)                       | 16 (25)                       |            |
| <i>Right coronary</i>                 | 137 (32)                      | 20 (31)                       |            |
| <i>Graft</i>                          | 17 (4)                        | 0 (0)                         |            |

|                                   |             |              |      |
|-----------------------------------|-------------|--------------|------|
| <b>Previous ST type</b>           |             |              | .45  |
| <i>BMS</i>                        | 162 (37)    | 27 (42)      |      |
| <i>DES</i>                        | 272 (63)    | 37 (58)      |      |
| <i>Length previous stent, mm</i>  | 20 ± 7      | 20 ± 7       | .76  |
| <b>Procedural characteristics</b> |             |              |      |
| <i>Treatment strategy</i>         |             |              | .59  |
| PCB                               | 219 (51)    | 30 (47)      |      |
| EES                               | 215 (50)    | 34 (53)      |      |
| <i>Length new EES/PCB, mm</i>     | 20 ± 8      | 21 ± 7       | .21  |
| <i>Maximal pressure, atm</i>      | 19 ± 4      | 20 ± 4       | .003 |
| <i>Inflation time, sec (+)</i>    | 83 ± 51     | 103 ± 55     | .06  |
|                                   | 80 [40-105] | 100 [60-120] | .02  |
| <i>Maximal balloon</i>            | 3.13 ± 0.5  | 2.99 ± 0.4   | .01  |
| <i>Balloon-to-artery ratio</i>    | 1.21 ± 0.2  | 1.21 ± 0.2   | .99  |
| <i>Crossover</i>                  | 14 (3)      | 0 (0)        | .23  |
| <i>Angiographic success</i>       | 434 (100)   | 64 (100)     | 1    |

BMS, bare metal stent; DES, drug-eluting stent; EES, everolimus eluting stent; OCT, optical coherence tomography; PCB, paclitaxel coated balloon.

The data are expressed as No. (%), mean ± standard deviation, or median [interquartile range].

**Table 2 of the supplementary data**

Angiographic results in patients in the RIBS IV and V trials included or not in the OCT substudy

|                                | No OCT<br>n = 434 (87%)              | OCT<br>n = 64 (13%)                     | <i>P</i>   |
|--------------------------------|--------------------------------------|-----------------------------------------|------------|
| <i>Mehran I,II,III-IV</i>      | 232 (54),<br>162 (37), 40 (9)        | 36 (56),<br>22 (34), 6 (9)              | .90        |
| <i>B2-C lesion</i>             | 203 (47)                             | 34 (53)                                 | .34        |
| <i>Edge-ISR</i>                | 74 (17)                              | 14 (22)                                 | .35        |
| <i>Quantitative findings</i>   | (n = 434)                            | (n = 64)                                |            |
| <i>Before the procedure</i>    |                                      |                                         |            |
| Reference vessel diameter, mm  | 2.65 ± 0.5                           | 2.54 ± 0.5                              | .11        |
| Minimum lumen diameter, mm     | 0.86 ± 0.4                           | 0.77 ± 0.3                              | .05        |
| Stenosis (% of lumen diameter) | 67 ± 16                              | 69 ± 13                                 | .31        |
| Lesion length, mm              | 11.6 ± 6                             | 12.9 ± 7                                | .14        |
| Diffuse lesions, ≥ 10 mm       | 209 (49)                             | 37 (60)                                 | .11        |
| <i>After the procedure</i>     |                                      |                                         |            |
| Reference vessel diameter, mm  | 2.62 ± 0.5                           | 2.51 ± 0.5                              | .11        |
| Minimum lumen diameter, mm     | 2.22 ± 0.5                           | 2.06 ± 0.5                              | .016       |
| Stenosis (% of lumen diameter) | 15 ± 11                              | 17 ± 12                                 | .16        |
| Acute gain, mm                 | 1.36 ± 0.5                           | 1.31 ± 0.5                              | .47        |
| <i>At follow-up</i>            | (n = 380)                            | (n = 62)                                |            |
| Reference vessel diameter, mm  | 2.68 ± 0.6                           | 2.57 ± 0.5                              | .13        |
| Minimal lumen diameter, mm     | 2.04 ± 0.7                           | 1.89 ± 0.7                              | .10        |
| Stenosis (% of lumen diameter) | 23 ± 21                              | 26 ± 24                                 | .37        |
| Restenosis                     | 43 (11)                              | 11 (18)                                 | .15        |
| Late loss, mm (mean/median)    | 0.18 ± 0.7 /<br>0.06 (-0.19 to 0.41) | 0.22 ± 0.6 /<br>0.07(-0.12 to 0.39)     | .69<br>.86 |
| Loss index (mean/median)       | 0.08 ± 0.6 /<br>0.04 (-0.15 to 0.29) | 0.17 ± 0.5 /<br>0.07 (-0.12 to<br>0.39) | .23<br>.66 |

|              |            |            |     |
|--------------|------------|------------|-----|
| Net gain, mm | 1.18 ± 0.7 | 1.09 ± 0.7 | .39 |
|--------------|------------|------------|-----|

ISR, in stent restenosis; OCT, optical coherence tomography.

The data are expressed as No. (%), mean ± standard deviation or median [interquartile range].
